# Supplementary material
Source: HighWire-hosted journal article supplement (https://erj.ersjournals.com/content/52/5/1801150)
Supplement: inline-supplementary-material-1 [file inline-supplementary-material-1.pdf]

**Supplementary Table 1. Baseline characteristics of the merged sample according to included and excluded participants.**

|                          |                           | Included sample<br>(n=2702) | Excluded sample<br>(n=534) | N    | p-value           |
|--------------------------|---------------------------|-----------------------------|----------------------------|------|-------------------|
| Age (years)              |                           | 53.5 ± 19.1                 | 47.7 ± 25.0                | 3236 | <b>&lt;0.0001</b> |
| BMI (kg/m <sup>2</sup> ) |                           | 25.8 ± 5.8                  | 26.2 ± 5.5                 | 3223 | 0.573             |
| AHI                      |                           | 8.3. ± 15.1                 | 5.7 ± 13.1                 | 3236 | <b>&lt;0.0001</b> |
| Sex                      |                           |                             |                            | 3236 | 0.074             |
|                          | <i>Men</i>                | 53.1% (1,435)               | 48.9% (261)                |      |                   |
|                          | <i>Women</i>              | 46.9% (1,267)               | 51.1% (273)                |      |                   |
| Cohort                   |                           |                             |                            | 3236 | <b>&lt;0.0001</b> |
|                          | <i>Episono</i>            | 26.4% (712)                 | 67.8% (362)                |      |                   |
|                          | <i>HypnoLaus</i>          | 73.6% (1990)                | 32.2% (172)                |      |                   |
| MetS                     |                           |                             |                            | 3185 | 0.401             |
|                          | <i>Yes</i>                | 28.6% (768)                 | 30.5% (153)                |      |                   |
|                          | <i>No</i>                 | 71.4% (1,915)               | 69.5% (349)                |      |                   |
| Education                |                           |                             |                            | 3224 | <b>0.028</b>      |
|                          | <i>Low</i>                | 47.1% (1,269)               | 51.8% (274)*               |      |                   |
|                          | <i>Middle</i>             | 30.5% (823)                 | 30.8% (163)                |      |                   |
|                          | <i>High</i>               | 22.4% (603)                 | 17.4% (92)*                |      |                   |
| Marital status           |                           |                             |                            | 3191 | <b>0.001</b>      |
|                          | <i>Single</i>             | 19.5% (522)                 | 26.1% (133)*               |      |                   |
|                          | <i>Married</i>            | 61.6% (1651)                | 59.8% (305)                |      |                   |
|                          | <i>Divorced/Separated</i> | 15.3% (409)                 | 10.4% (53)*                |      |                   |
|                          | <i>Widowed</i>            | 3.7% (99)                   | 3.7% (19)                  |      |                   |

AHI: apnoea-hypopnoea index, BMI: body mass index, MetS: metabolic syndrome.

Results are expressed as percentage (number of participants) or as median ± interquartile interval. Between-group comparisons performed using Pearson's chi-square for categorical variables and Mann-Whitney test for continuous variables.

**Supplementary Table 2. Demographic characteristics of HypnoLaus and Episono cohorts by incidence of metabolic syndrome.**

|                           | HypnoLaus                    |                          |      |                   | Episono                     |                          |     |                   |
|---------------------------|------------------------------|--------------------------|------|-------------------|-----------------------------|--------------------------|-----|-------------------|
|                           | No-incident MetS<br>(n=1292) | Incident MetS<br>(n=109) | N    | p-value           | No-incident MetS<br>(n=284) | Incident MetS<br>(n=225) | N   | p-value           |
| Age (years)               | 54.2 ± 17.0                  | 55.6 ± 15.0              | 1401 | 0.246             | 36.6 ± 20.2                 | 41.0 ± 18.2              | 509 | <b>0.014</b>      |
| Follow-up time (years)    | 5.2 ± 0.3                    | 5.1 ± 0.2                | 1401 | 0.46              | 8.0 ± 0.4                   | 8.0 ± 0.3                | 509 | 0.497             |
| Sex                       |                              |                          | 1401 | <b>0.001</b>      |                             |                          | 509 | 0.115             |
| <i>Men</i>                | 42.3% (547)                  | 58.7% (64)*              |      |                   | 47.9% (136)                 | 40.9% (92)               |     |                   |
| <i>Women</i>              | 57.7% (745)                  | 41.3% (45)               |      |                   | 52.1% (148)                 | 59.1% (133)              |     |                   |
| BMI (kg/m <sup>2</sup> )  |                              |                          | 1391 | <b>&lt;0.0001</b> |                             |                          | 509 | <b>&lt;0.0001</b> |
| ≤24.9                     | 60.2% (772)                  | 18.3% (20)               |      |                   | 62.5% (177)                 | 31.1% (70)               |     |                   |
| <i>BMI 25-29.9</i>        | 35.0% (449)                  | 64.2% (70)*              |      |                   | 29.6% (84)                  | 49.8% (112)*             |     |                   |
| <i>BMI&gt;29.9</i>        | 4.8% (61)                    | 17.4% (19)*              |      |                   | 8.1% (23)                   | 19.1% (43)*              |     |                   |
| Education                 |                              |                          | 1400 | <b>0.009</b>      |                             |                          | 505 | 0.069             |
| <i>Low</i>                | 46.2% (597)                  | 59.6% (65)*              |      |                   | 30.6% (86)                  | 37.1% (83)               |     |                   |
| <i>Middle</i>             | 29.7% (383)                  | 27.5% (30)               |      |                   | 41.3% (116)                 | 43.3% (97)               |     |                   |
| <i>High</i>               | 24.1% (311)                  | 12.8% (14)               |      |                   | 28.1% (79)                  | 19.6% (44)               |     |                   |
| Marital status            |                              |                          | 1390 | 0.621             |                             |                          | 496 | 0.055             |
| <i>Single</i>             | 16.0% (205)                  | 13.0% (14)               |      |                   | 38.8% (107)                 | 27.7% (61)               |     |                   |
| <i>Married</i>            | 58.2% (746)                  | 60.2% (65)               |      |                   | 54.3% (150)                 | 66.4% (146)              |     |                   |
| <i>Divorced/Separated</i> | 21.2% (272)                  | 24.1% (26)               |      |                   | 4.0% (11)                   | 3.6% (8)                 |     |                   |
| <i>Widowed</i>            | 4.6% (59)                    | 2.8% (3)                 |      |                   | 2.9% (8)                    | 2.3% (5)                 |     |                   |

BMI: body mass index.

Results expressed as frequency in percentage (n) within each group or median ± interquartile interval and analyzed with bivariate tests (Pearson's chi-square or Mann-Whitney test).

**Supplementary Table 3. Sleep predictors of metabolic syndrome according to sex in the merged sample.**

|                                     | OR                  | 95% CI        | N         | p-value      |
|-------------------------------------|---------------------|---------------|-----------|--------------|
| <b>Men</b>                          |                     |               |           |              |
| TST (min)                           | 0.998               | 0.995 - 1.001 | 802       | 0.244        |
| Sleep efficiency (%)                | 0.997               | 0.974 - 1.021 | 802       | 0.791        |
| N3 (%)                              | 1.014               | 0.986 - 1.043 | 802       | 0.318        |
| REM sleep (%)                       | 0.975               | 0.942 - 1.010 | 802       | 0.165        |
| Arousal index                       | 1.000               | 0.995 - 1.005 | 802       | 0.984        |
| AHI                                 | 1.011               | 0.996 - 1.026 | 802       | 0.161        |
|                                     | <5 events/h         |               | Reference |              |
|                                     | ≥5 and <15 events/h |               |           | 0.595        |
|                                     | ≥15 events/h        |               |           | <b>0.010</b> |
| Mean SpO <sub>2</sub> (%)           | 0.993               | 0.935 - 1.054 | 802       | 0.811        |
| Lowest SpO <sub>2</sub> (%)         | 0.971               | 0.941 - 1.002 | 802       | 0.068        |
| 3% ODI                              | 1.011               | 0.994 - 1.027 | 800       | 0.212        |
| Time with SpO <sub>2</sub> <90% (%) | 0.995               | 0.975 - 1.016 | 797       | 0.658        |
| Self-reported sleep duration (h)    | 0.945               | 0.803 - 1.112 | 775       | 0.495        |
| ESS score                           | 1.045               | 0.993 - 1.099 | 755       | 0.090        |
| <b>Women</b>                        |                     |               |           |              |
| TST (min)                           | 0.999               | 0.995 - 1.002 | 1028      | 0.427        |
| Sleep efficiency (%)                | 0.988               | 0.965 - 1.012 | 1028      | 0.327        |
| N3 (%)                              | 0.994               | 0.966 - 1.022 | 1028      | 0.652        |
| REM sleep (%)                       | 1.001               | 0.967 - 1.036 | 1028      | 0.963        |
| Arousal index                       | 1.003               | 0.997 - 1.008 | 1028      | 0.322        |
| AHI                                 | 1.003               | 0.980 - 1.026 | 1028      | 0.825        |
|                                     | <5 events/h         |               | Reference |              |
|                                     | ≥5 and <15 events/h |               |           | 0.116        |
|                                     | ≥15 events/h        |               |           | <b>0.028</b> |
| Mean SpO <sub>2</sub> (%)           | 0.838               | 0.719 - 0.977 | 1028      | <b>0.024</b> |
| Lowest SpO <sub>2</sub> (%)         | 1.023               | 0.975 - 1.074 | 1028      | 0.348        |
| 3% ODI                              | 1.006               | 0.981 - 1.032 | 1027      | 0.629        |
| Time with SpO <sub>2</sub> <90% (%) | 1.019               | 0.998 - 1.041 | 1012      | 0.070        |
| Self-reported sleep duration (h)    | 1.047               | 0.895 - 1.224 | 995       | 0.567        |
| ESS score                           | 0.966               | 0.921 - 1.013 | 975       | 0.159        |

AHI: apnoea-hypopnoea index, ESS: Epworth sleepiness scale, ODI: oxygen desaturation index, N3: slow-wave sleep, REM: rapid eyes movement, SpO<sub>2</sub>: oxygen saturation, TST: total sleep time.

Data analyzed using multivariable logistic regression with adjustment for cohort, age, body mass index and number of metabolic syndrome components at baseline.

**Supplementary Table 4. Changes in sleep parameters from baseline to follow-up as predictors of metabolic syndrome in the Episoño cohort.**

|                                                 | OR    | 95% CI        | N   | p-value      |
|-------------------------------------------------|-------|---------------|-----|--------------|
| TST (10-min increment)                          | 0.990 | 0.970 - 1.020 | 464 | 0.683        |
| Sleep efficiency (10% increment)                | 1.062 | 0.886 - 1.268 | 464 | 0.512        |
| N3 (10% increment)                              | 0.842 | 0.672 - 1.051 | 464 | 0.133        |
| REM sleep (10% increment)                       | 1.000 | 0.753 - 1.318 | 464 | 0.986        |
| Arousal index (10 events/h increment)           | 1.149 | 0.932 - 1.411 | 464 | 0.184        |
| AHI (10 events/h increment)                     | 1.172 | 0.990 - 1.397 | 464 | 0.072        |
| Mean SpO <sub>2</sub> (1% increment)            | 0.882 | 0.762 - 1.038 | 464 | 0.093        |
| Lowest SpO <sub>2</sub> (1% increment)          | 0.960 | 0.916 - 1.037 | 464 | 0.084        |
| 3% ODI (10 events/h increment)                  | 1.243 | 1.041 - 2.004 | 461 | <b>0.018</b> |
| Time with SpO <sub>2</sub> <90% (10% increment) | 1.424 | 1.041 -1.949  | 459 | <b>0.028</b> |
| Self-reported sleep duration (1h increment)     | 0.919 | 0.810 - 1.056 | 462 | 0.19         |
| ESS score (1-unit increment)                    | 1.016 | 0.971 - 1.027 | 463 | 0.494        |

Changes were computed as follow-up - baseline

AHI: apnoea-hypopnoea index, ESS: Epworth sleepiness scale, ODI: oxygen desaturation index, N3: slow-wave sleep, REM: rapid eyes movement, SpO<sub>2</sub>: oxygen saturation, TST: total sleep time.

Data analyzed using multivariable logistic regression with adjustment for age, sex, body mass index, difference in body mass index from baseline to follow-up and number of metabolic syndrome components at baseline.

**Supplementary Table 5. Metabolic syndrome as a risk factor for incident obstructive sleep apnoea in the Episono cohort.**

|                          | OR    | 95% CI        | p-value      |
|--------------------------|-------|---------------|--------------|
| <b>Model 1</b>           |       |               |              |
| Constant                 | 0.018 | -             | <0.0001      |
| Age (years)              | 1.028 | 1.009 - 1.048 | <b>0.004</b> |
| Sex (men)                | 2.166 | 1.345 - 3.486 | <b>0.001</b> |
| Apnoea-hypopnoea index   | 1.300 | 1.210 - 1.395 | <0.0001      |
| Metabolic syndrome       | 1.915 | 1.130 - 3.245 | <b>0.016</b> |
| <b>Model 2</b>           |       |               |              |
| Constant                 | 0.005 | -             | <0.0001      |
| Age (years)              | 1.030 | 1.010 - 1.050 | <b>0.003</b> |
| Sex (men)                | 0.379 | 0.230 - 0.625 | <0.0001      |
| BMI (kg/m <sup>2</sup> ) | 1.091 | 1.037 - 1.149 | <b>0.001</b> |
| Apnoea-hypopnoea index   | 1.272 | 1.183 - 1.367 | <0.0001      |
| Metabolic syndrome       | 1.276 | 0.714 - 2.279 | 0.411        |

Data analyzed using multivariable logistic regression (N=476).

Adjustment for sex, age and baseline AHI (Model 1); + baseline BMI (Model 2).
